# Supplementary material for: Independent and Joint Effects of Prenatal Incense-Burning Smoke Exposure and Children’s Early Outdoor Activity on Preschoolers’ Obesity
Source: MDPI journal article supplement (doi:10.3390/toxics12050329), 2024-04-30
Supplement: s1 [file s1]

# Health Records of Preschool children in Longhua District, Shenzhen (Excerpts)

## Part I. Demographic Characteristics

- O1 **Child name:** \_\_\_\_
- O2 **Date of birth:** \_\_\_\_
- O3 **Child sex**  
1=Boy, 2=Girl
- O4 **Id number:** \_\_\_\_
- O9 **Home address:** \_\_\_\_
- A2 **The child's height is \_\_\_\_ centimeters and his weight is \_\_\_\_ kilograms.**
- A5 **The child's mother's marital status is:**  
1= Married, 2= Others
- A6 **Mother's date of birth:** \_\_\_\_
- A7 **Mother's degree is:**  
1= junior high school and below, 2= high school, 3= junior college and above
- A8 **Mother's occupation is:**  
1= workers, 2= farmers, 3= soldiers, 4= administrative cadres, 5= science and technology, medical, teachers, 6= individuals, business, enterprise, government (service personnel), 7= housework, 8= unemployed people, 9= students, 10= others
- A10 **Father's date of birth:** \_\_\_\_
- A11 **Father's degree is:**  
1= junior high school and below, 2= high school, 3= junior college and above
- A12 **Father's occupation is:**  
1= workers, 2= farmers, 3= soldiers, 4= administrative cadres, 5= science and technology, medical, teachers, 6= individuals, business, enterprise, government (service personnel), 7= housework, 8= unemployed people, 9= students, 10= others
- A13 **The total monthly income of your family is**  
1= < 20,000 yuan, 2= 20,000-40,000 yuan (including 20,000), 3= more than 40,000 yuan (including 40,000)
- A15 **Is your child an only child?**  
0= Yes, 1= No

## Part II. Pregnancy Situation

- B11.2 **Whether the mother took folic acid during pregnancy with this child**  
0= No, 1= Yes
- B12.2 **Whether the mother was exposed to interior decoration during the pregnancy of this child**  
0= No, 1= Yes
- B12.3 **Whether the mother exposed to heavy metals (lead, chromium, cadmium, etc.) during pregnancy with this child?**  
0= No, 1= Yes
- B12.4 **Whether the mother exposed to organic solvents (xylene, etc.) during pregnancy with this child?**  
0= No, 1= Yes
- B19 **The mother's height before this pregnancy was \_\_\_\_ centimeters and her weight was \_\_\_\_ kilograms**
- B20 **The mother gained weight during pregnancy with this child:**

1=<5 kg,2=5-10 kg (inclusive of 10kg),3=10-15 kg (inclusive of 15kg),4=15-20 kg (inclusive of 20kg),5= > 20kg

**During the pregnancy of this child, did anyone in the family living with the mother smoke in the presence of the mother (including e-cigarettes)?**

B21

0= No, 1= Yes

**Was the mother exposed to cooking fumes during the first trimester of pregnancy?**

B27

0= No contact,1= occasional contact,2= frequent contact,3= almost daily contact

**Was the mother exposed to cooking fumes during the second trimester of pregnancy?**

B28

0= No contact,1= occasional contact,2= frequent contact,3= almost daily contact

**Was the mother exposed to cooking fumes during the third trimester of pregnancy?**

B29

0= No contact,1= occasional contact,2= frequent contact,3= almost daily contact

**Did your household have the habit of lighting mosquito-repellent incense (excluding electric mosquito-repellent incense) during your pregnancy in 1-13 weeks (the first trimester)?**

B31

0=no, 1= sometimes (1 times/week), 2=often (times/week).

**Did your household have the habit of lighting mosquito-repellent incense (excluding electric mosquito-repellent incense) during your pregnancy in 14-27 weeks (the second trimester)?**

B32

0=no, 1= sometimes (1 times/week), 2=often (times/week).

**Did your household have the habit of lighting mosquito-repellent incense (excluding electric mosquito-repellent incense) during your pregnancy after 28 weeks (the third trimester)?**

B33

0=no, 1= sometimes (1 times/week), 2=often (times/week).

**Did your household have the habit of burning incense at home during your pregnancy in 1-13 weeks (the first trimester)?**

B34

0=no, 1= sometimes (1 times/week), 2=often (times/week).

**Did your household have the habit of burning incense at home during your pregnancy in 14-27 weeks (the second trimester)?**

B35

0=no, 1= sometimes (1 times/week), 2=often (times/week).

**Did your household have the habit of burning incense at home during your pregnancy after 28 weeks (the third trimester)?**

B36

0=no, 1= sometimes (1 times/week), 2=often (times/week).

### Part III. Child birth

**The gestational age of the child is \_\_\_\_ weeks**

C1

**Whether premature birth:**

C2

0= no,1= yes

**Weight at birth: \_\_\_\_ kg.**

C3

Birth weight (cleaned for gestational age)

BW

**Length at birth: \_\_\_\_ cm.**

C4

### Part IV. 0-3 years old

**Feeding method for children from 0 to 6 months**

D1

1= Breastfeeding, 2= Breastfeeding, 3= Mixed feeding (refers to the above two feeding methods)

**The nutritional status of children during the 0-1 years of age is as follows:**

D5

1= Poor, 2= Medium, 3= Well

**The nutritional status of children during the 1-3 years of age is as follows:**

E1

1= Poor, 2= Medium, 3= Well

E10 **How often did your baby go outdoors during the year of 1-3 years old?**

0= < 3 times/week, 1= $\geq$ 3 times/week

E11 **How much time did your baby spend outdoors on average during the year of 1-3 years old?**

1=60 minutes/time, 2= $\geq$ 60 minutes/time
