# Supplementary material for: Independent and Joint Effects of Prenatal Incense-Burning Smoke Exposure and Children’s Early Outdoor Activity on Preschoolers’ Obesity
Source: MDPI journal article supplement (doi:10.3390/toxics12050329), 2024-04-30
Supplement: s1 [file s1]

## Sensitivity analysis after excluding PTB and LBW

**Table S1.** Associations between maternal incense burning smoke exposure during pregnancy and children's obesity.

| IBS exposure     | AOR (95% CI) <sup>a</sup> |
|------------------|---------------------------|
| During pregnancy |                           |
| No               | 1.00                      |
| Yes              | 1.13 (1.03, 1.25) *       |

Model a: adjusted for child's gender and age, single child or not, parental age at conception, maternal marital status and pre-pregnancy BMI, family income, prenatal exposure to ETS, MCS, cooking oil fumes, child's feeding pattern, early nutritional status, folic acid intake during pregnancy.

AOR: adjusted OR. \*  $p < 0.05$ , \*\*  $p < 0.01$ .

**Table S2.** Associations between trimester-specific IBS exposure during pregnancy and children's obesity.

| Trimester-specific IBS exposure | Total, N = 64,889 | Obesity, n (%) | Excluding PTB and LBW<br>AOR (95% CI) <sup>a</sup> |
|---------------------------------|-------------------|----------------|----------------------------------------------------|
| <b>1st trimester</b>            |                   |                |                                                    |
| No                              | 59732             | 5933 (9.9)     | 1.00                                               |
| Yes                             | 5157              | 605 (11.7)     | 1.15 (1.04, 1.28) **                               |
| <b>2nd trimester</b>            |                   |                |                                                    |
| No                              | 60243             | 5999 (10.0)    | 1.00                                               |
| Yes                             | 4646              | 539 (11.6)     | 1.15 (1.04, 1.28) **                               |
| <b>3rd trimester</b>            |                   |                |                                                    |
| No                              | 60222             | 6019 (10.0)    | 1.00                                               |
| Yes                             | 4667              | 519 (11.1)     | 1.08 (0.96, 1.20)                                  |

Model a: adjusted for child's gender and age, single child or not, parental age at conception, maternal marital status and pre-pregnancy BMI, family income, prenatal exposure to ETS, MCS, cooking oil fumes, child's feeding pattern, early nutritional status, folic acid intake during pregnancy.

**Table S3.** Associations between frequency of trimester-specific IBS exposure during pregnancy and children's obesity.

| Frequency of IBS exposure | Excluding PTB and LBW<br>AOR (95% CI) <sup>a</sup> |
|---------------------------|----------------------------------------------------|
| <b>1st trimester</b>      |                                                    |
| Never                     | 1.00                                               |
| 1 time/week               | 1.13 (1.01, 1.26) *                                |
| ≥2 time/week              | 1.35 (1.04, 1.73) *                                |
| <b>2nd trimester</b>      |                                                    |

|               |                     |
|---------------|---------------------|
| Never         | 1.00                |
| 1 time/week   | 1.14 (1.02, 1.28) * |
| ≥2 time/week  | 1.25 (0.93, 1.64)   |
| 3rd trimester |                     |
| Never         | 1.00                |
| 1 time/week   | 1.08 (0.96, 1.21)   |
| ≥2 time/week  | 1.08 (0.79, 1.43)   |

Model a: adjusted for child's gender and age, single child or not, parental age at conception, maternal marital status and pre-pregnancy BMI, family income, prenatal exposure to ETS, MCS, cooking oil fumes, child's feeding pattern, early nutritional status, folic acid intake during pregnancy.

**Table S4.** The associations between frequency of trimester-specific IBS exposure during pregnancy and children's obesity.

| group | Trimester-specific exposure |               |               | AOR (95% CI) <sup>a</sup> |
|-------|-----------------------------|---------------|---------------|---------------------------|
|       | 1st trimester               | 2nd trimester | 3rd trimester |                           |
| 1     | No                          | No            | No            | 1.00                      |
| 2     | Yes                         | No            | No            | 1.18 (0.94, 1.45)         |
| 3     | No                          | Yes           | No            | 1.28 (0.77, 2.00)         |
| 4     | No                          | No            | Yes           | 0.85 (0.56, 1.23)         |
| 5     | Yes                         | Yes           | No            | 1.61 (1.12, 2.25) **      |
| 6     | Yes                         | No            | Yes           | 0.77 (0.27, 1.75)         |
| 7     | No                          | Yes           | Yes           | 0.69 (0.24, 1.56)         |
| 8     | Yes                         | Yes           | Yes           | 1.13 (1.01, 1.27) *       |

Model a: adjusted for child's gender and age, single child or not, parental age at conception, maternal marital status and pre-pregnancy BMI, family income, prenatal exposure to ETS, MCS, cooking oil fumes, child's feeding pattern, early nutritional status, folic acid intake during pregnancy.

AOR: adjusted OR. \*  $p < 0.05$ , \*\*  $p < 0.01$ .

**Table S5.** Associations between frequency and duration of outdoor activity from 1 to 3 years of age on preschool obesity.

| Outdoor activity                   | AOR (95% CI) <sup>a</sup> |
|------------------------------------|---------------------------|
| Frequency during 1-3 years old (%) |                           |
| ≥3times/week                       | 1.00                      |
| <3 times/week                      | 1.24 (1.17, 1.32) ***     |
| Duration during 1-3 years old (%)  |                           |
| ≥60 min/time                       | 1.00                      |
| <60 min/time                       | 1.09 (1.03, 1.16) **      |
| Overall outdoor factors            |                           |
| ≥ 3 times/week + ≥ 60 min/time     | 1.00                      |
| ≥ 3 times/week + < 60 min/time     | 0.99 (0.91, 1.07)         |

|                                |                       |
|--------------------------------|-----------------------|
| < 3 times/week + ≥ 60 min/time | 1.15 (1.06, 1.25) *** |
| < 3 times/week + < 60 min/time | 1.33 (1.23, 1.45) *** |

Model a: adjusted for child's gender and age, single child or not, parental age at conception, maternal marital status and pre-pregnancy BMI, family income, prenatal exposure to ETS, MCS, cooking oil fumes, child's feeding pattern, early nutritional status, folic acid intake during pregnancy.

AOR: adjusted OR. \* p < 0.05, \*\* p < 0.01, \*\*\* p < 0.001.

**Table S6.** Combination Effect between maternal IBS exposure during pregnancy and outdoor activity from 1 to 3 years of age on preschool obesity.

| IBS exposure      | Outdoor activity               | Excluding PTB and LBW     |                     |                            |                          |
|-------------------|--------------------------------|---------------------------|---------------------|----------------------------|--------------------------|
|                   |                                | AOR (95% CI) <sup>a</sup> | IOR (95% CI)        | RERI (95% CI) <sup>a</sup> | AP (95% CI) <sup>a</sup> |
| Prenatal exposure | Frequency during 1-3 years old |                           |                     |                            |                          |
| No                | ≥3times/week                   | 1.00                      |                     |                            |                          |
| No                | <3 times/week                  | 1.20 (1.13, 1.29) ***     |                     |                            |                          |
| Yes               | ≥3times/week                   | 1.01 (0.88, 1.15)         |                     |                            |                          |
| Yes               | <3 times/week                  | 1.49 (1.31, 1.70) ***     | 1.23 (1.02, 1.49) * | 0.09 (0.04,0.15)           | 0.07 (0.03,0.10)         |
| Prenatal exposure | Duration during 1-3 years old  |                           |                     |                            |                          |
| No                | ≥60 min/time                   | 1.00                      |                     |                            |                          |
| No                | <60 min/time                   | 1.09 (1.02, 1.16) **      |                     |                            |                          |
| Yes               | ≥60 min/time                   | 1.13 (1.00, 1.27)         |                     |                            |                          |
| Yes               | <60 min/time                   | 1.23 (1.06, 1.42) **      | 1.00 (0.83, 1.21)   | 0.07 (0.03,0.12)           | 0.06 (0.03,0.09)         |

Model a: adjusted for child's gender and age, single child or not, parental age at conception, maternal marital status and pre-pregnancy BMI, family income, prenatal exposure to ETS, MCS, cooking oil fumes, child's feeding pattern, early nutritional status, folic acid intake during pregnancy.

AOR: adjusted OR. \* p < 0.05, \*\* p < 0.01, \*\*\* p < 0.001.
